# Supplementary material for: Structural Color Filters Enabled by a Dielectric Metasurface Incorporating Hydrogenated Amorphous Silicon Nanodisks
Source: PubMed Central journal article supplement (PMC5451390; doi:10.1038/s41598-017-02911-w), 2017-05-31
Supplement: 41598_2017_2911_MOESM1_ESM.pdf [file 41598_2017_2911_MOESM1_ESM.pdf]

## SUPPLEMENTARY INFORMATION

# Structural Color Filters Enabled by a Dielectric Metasurface Incorporating Hydrogenated Amorphous Silicon Nanodisks

*Chul-Soon Park<sup>1,\*</sup>, Vivek Raj Shrestha<sup>1,2,\*</sup>, Wenjing Yue<sup>1</sup>, Song Gao<sup>1</sup>, Sang-Shin Lee<sup>1</sup>, Eun-Soo Kim<sup>1</sup>, and Duk-Yong Choi<sup>3</sup>*

<sup>1</sup>Department of Electronic Engineering, Kwangwoon University, 20 Kwangwoon-ro, Nowon-gu, Seoul 01897, South Korea

<sup>2</sup>School of Physics, The University of Melbourne, Melbourne, Victoria 3010, Australia

<sup>3</sup>Laser Physics Centre, Research School of Physics and Engineering, Australian National University, Canberra ACT 2601, Australia

*\*These authors contributed equally to this work.*

*Correspondence and requests for materials should be addressed to S.S.L. (email: slee@kw.ac.kr) and D.Y.C. (email: duk.choi@anu.edu.au)*

Keywords: Optical materials and structures, Metamaterials, Nanophotonics and plasmonics

## 1. Material properties used for the calculation.

Figure S1 shows the refractive indices of a-Si:H and c-Si. The former was obtained by characterizing a film that is deposited on a glass substrate with the help of a reflecto-spectrometer, while the latter is available from Palik [1].

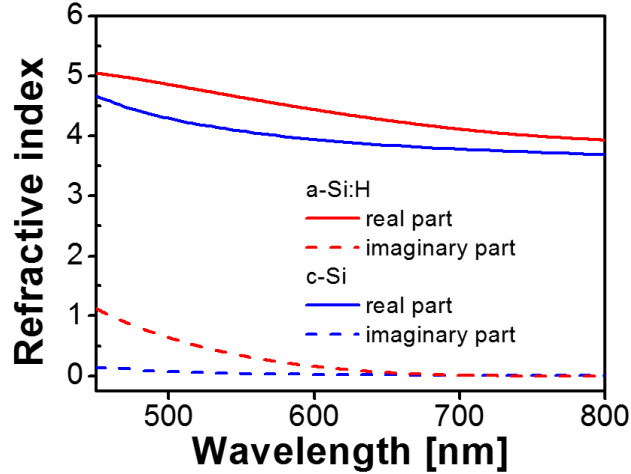

**Supplementary Figure S1.** Refractive indices of a-Si:H and c-Si that are used for the calculation.

## 2. Effect of the height ( $H_g$ ) of a-Si:H nanodisks on the device performance.

The location of the transmission dips pertaining to the electric dipole (ED) and the magnetic dipole (MD) can be altered by changing the height ( $H_g$ ). As  $H_g$  is increased, both the ED and MD resonance dips tend to be red-shifted, with the MD resonance occurring in the longer wavelength region than the ED resonance. For  $H_g$  beyond 100 nm, it is particularly noted that small transmission dips, which are accounted for by a multi-pole resonance such as a magnetic quadrupole (MQ), are observed to manifest in the spectral band shorter than the ED and MD resonances [2, 3], as indicated in Figure S2.

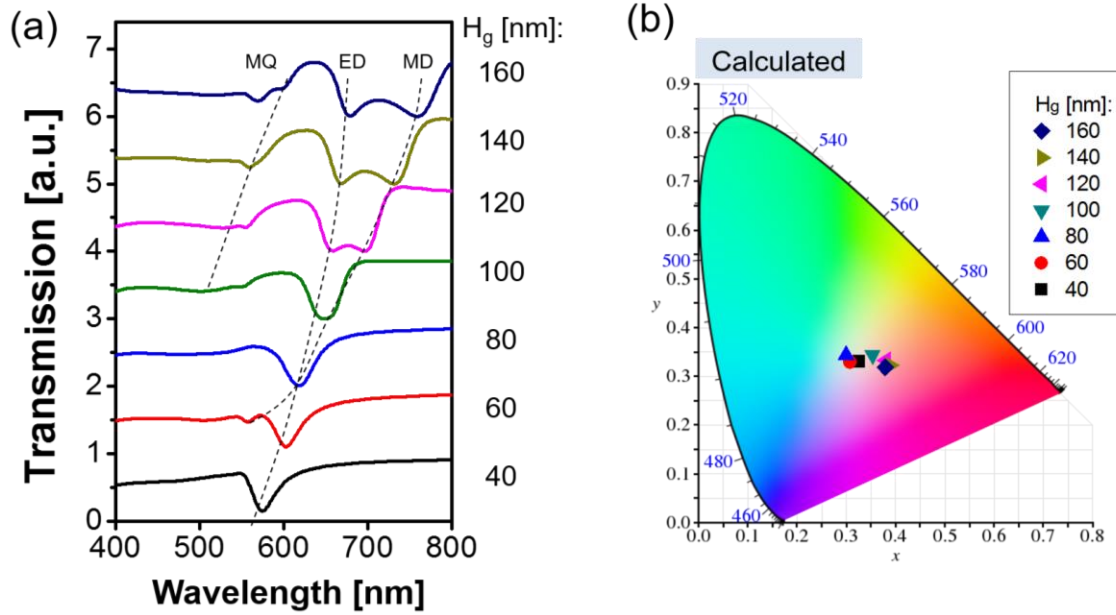

**Supplementary Figure S2.** (a) Calculated transmission spectra for the metasurface with  $P = 380$  nm and  $D = 180$  nm, while  $H_g$  is varied from 40 nm to 160 nm. (b) CIE 1931 chromaticity diagram for the corresponding color output.

### 3. Performance of the metasurface based on a c-Si nanodisk.

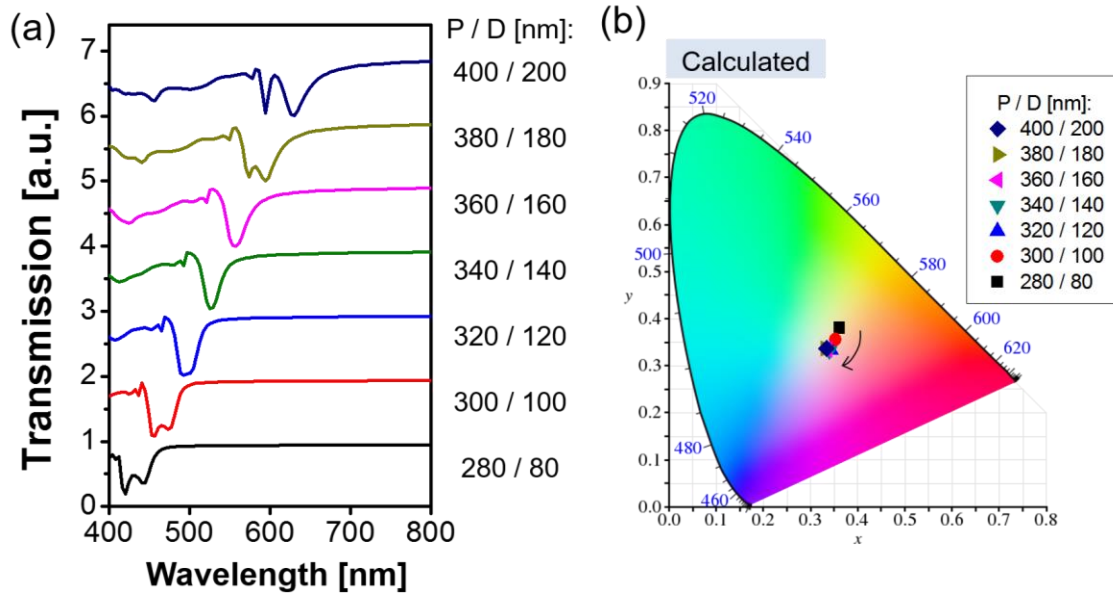

**Supplementary Figure S3.** (a) Calculated transmission spectra for the metasurface exploiting a c-Si nanodisk when the period is varied from  $P = 280$  nm to 400 nm under the relationship of  $P = D + 200$  [nm], while the diameter is varied from  $D = 80$  nm to 200 nm. (b) CIE 1931 chromaticity diagram for the corresponding color output.

4. Observation of the Mie scattering-induced resonance for the metasurface that engages a c-Si nanodisk.

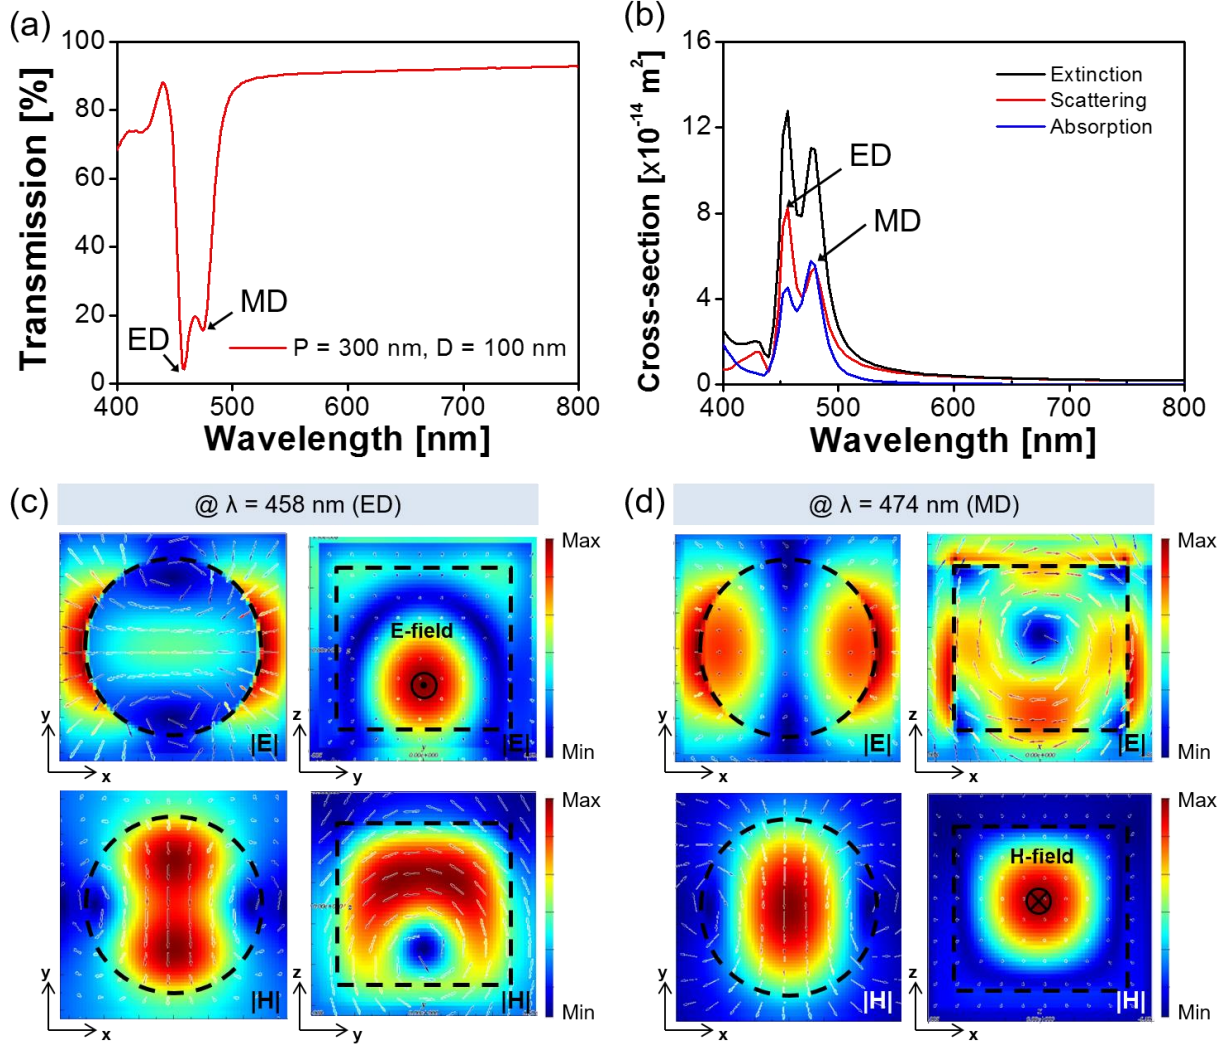

**Supplementary Figure S4.** (a) Calculated transmission spectra for the metasurface with  $P = 300$  nm and  $D = 100$  nm, rendering two distinct resonances at  $\lambda = 458$  nm and  $474$  nm. (b) Calculated extinction, scattering, and absorption cross-section for the c-Si nanodisk. Field profiles for (c) the ED resonance at  $\lambda = 458$  nm and (d) the MD resonance at  $\lambda = 474$  nm.

**References**

[1] E. D. Palik, “*Handbook of Optical Constants of Solids III*,” (Academic Press, San Diego, USA, 1998).  
 [2] A. I. Kuznetsov, A. E. Microshnichenko, Y. H. Fu, J. B. Zhang, and B. Luk’yanchuk, “Magnetic light,” *Sci. Rep.* **2**, 492 (2012).  
 [3] J. van de Groep and A. Polman, “Designing dielectric resonators on substrates: Combining magnetic and electric resonances,” *Opt. Express* **21**, 26285-26302 (2013).
